# Supplementary material for: The Effect of Starting Blood Glucose Levels on Serum Electrolyte Concentrations during and after Exercise in Type 1 Diabetes
Source: Int J Environ Res Public Health. 2023 Jan 24;20(3):2109. doi: 10.3390/ijerph20032109 (PMC9915529; doi:10.3390/ijerph20032109)
Supplement: Supplementary file 1 [file ijerph-20-02109-s001.zip › ijerph-2182241-supplementary.pdf]

**Supplementary Table S1.** Serum and urine measures in CON, T1D MOD, and T1D HI presented as mean  $\pm$  SEM.

|                                        |                        | CON (n=12)          | T1D MOD (n=12)    | T1D HI (n=12)     |
|----------------------------------------|------------------------|---------------------|-------------------|-------------------|
| Serum Glucose (mmol/L)                 | Pre exercise (0 Time)  | 4.9 $\pm$ 0.1       | 10.4 $\pm$ 0.4    | 13.7 $\pm$ 0.7    |
|                                        | Post exercise (45 min) | 5.08 $\pm$ 0.2 *# ^ | 7.5 $\pm$ 0.7     | 10.1 $\pm$ 0.6 *# |
|                                        | Recovery (105 min)     | 4.7 $\pm$ 0.05 *# ^ | 11.2 $\pm$ 0.8    | 14.0 $\pm$ 1.3 *# |
| Serum Insulin (mmol/L)                 | Pre exercise (0 Time)  | 54.0 $\pm$ 14.0     | 169.6 $\pm$ 50.0  | 167.4 $\pm$ 45.3  |
|                                        | Post exercise (45 min) | 21.4 $\pm$ 4.7 *^   | 183.7 $\pm$ 61.3  | 164.6 $\pm$ 49.8  |
|                                        | Recovery (105 min)     | 26.1 $\pm$ 5.2 *    | 168.2 $\pm$ 54.2  | 167.9 $\pm$ 41.0  |
| Serum Sodium (mmol/L)                  | Pre exercise (0 Time)  | 141.3 $\pm$ 0.2     | 140.6 $\pm$ 0.5   | 139.8 $\pm$ 0.6   |
|                                        | Post exercise (45 min) | 141.7 $\pm$ 0.2 # ^ | 143.0 $\pm$ 0.7   | 141.8 $\pm$ 0.5 # |
|                                        | Recovery (105 min)     | 141.2 $\pm$ 0.4 # ^ | 139.6 $\pm$ 0.7   | 139.1 $\pm$ 0.4 # |
| Serum Potassium (mmol/L)               | Pre exercise (0 Time)  | 3.7 $\pm$ 0.1       | 3.9 $\pm$ 0.09    | 4 $\pm$ 0.08      |
|                                        | Post exercise (45 min) | 4.3 $\pm$ 0.04 #    | 4.3 $\pm$ 0.08    | 4.5 $\pm$ 0.07 #  |
|                                        | Recovery (105 min)     | 4 $\pm$ 0.1 #       | 4 $\pm$ 0.08      | 4.1 $\pm$ 0.1 #   |
| Serum Calcium (mmol/L)                 | Pre exercise (0 Time)  | 2.1 $\pm$ 0.1       | 2.2 $\pm$ 0.02    | 2.2 $\pm$ 0.03    |
|                                        | Post exercise (45 min) | 2.4 $\pm$ 0.01 #    | 2.3 $\pm$ 0.04    | 2.4 $\pm$ 0.03 #  |
|                                        | Recovery (105 min)     | 2.2 $\pm$ 0.01 *#   | 2.2 $\pm$ 0.02    | 2.2 $\pm$ 0.02 #  |
| Serum Magnesium (mmol/L)               | Pre exercise (0 Time)  | 0.8 $\pm$ 0.01      | 0.7 $\pm$ 0.01    | 0.7 $\pm$ 0.01    |
|                                        | Post exercise (45 min) | 0.8 $\pm$ 0.01 *#   | 0.7 $\pm$ 0.01    | 0.7 $\pm$ 0.01    |
|                                        | Recovery (105 min)     | 0.7 $\pm$ 0.01 *#   | 0.6 $\pm$ 0.02    | 0.7 $\pm$ 0.01 #  |
| Urine Glucose Concentration (mmol/L)   | Pre exercise (0 Time)  | 0.07 $\pm$ 0.01     | 2.9 $\pm$ 1.1     | 4.2 $\pm$ 1.2     |
|                                        | Post exercise (45 min) | 0.08 $\pm$ 0.01 *   | 1.7 $\pm$ 0.8     | 7.3 $\pm$ 0.7 *^  |
|                                        | Recovery (105 min)     | 0.1 $\pm$ 0.02 *    | 1.9 $\pm$ 0.9     | 5.9 $\pm$ 0.9 *   |
| Urine Specific Gravity                 | Pre exercise (0 Time)  | 1.013 $\pm$ 0.002   | 0.018 $\pm$ 0.002 | 1.018 $\pm$ 0.003 |
|                                        | Post exercise (45 min) | 1.012 $\pm$ 0.002 * | 1.021 $\pm$ 0.002 | 1.020 $\pm$ 0.002 |
|                                        | Recovery (105 min)     | 0.014 $\pm$ 0.002 * | 1.021 $\pm$ 0.002 | 1.020 $\pm$ 0.002 |
| Urine Sodium Concentration (mmol/L)    | Pre exercise (0 Time)  | 85.2 $\pm$ 14.6     | 75.3 $\pm$ 14.7   | 61.3 $\pm$ 12.4   |
|                                        | Post exercise (45 min) | 58.1 $\pm$ 6.4      | 79.0 $\pm$ 13.5   | 58.6 $\pm$ 8.4    |
|                                        | Recovery (105 min)     | 81.4 $\pm$ 14.1 #   | 85.2 $\pm$ 11.2   | 74.3 $\pm$ 7.8    |
| Urine Potassium Concentration (mmol/L) | Pre exercise (0 Time)  | 46.6 $\pm$ 8.5      | 77 $\pm$ 12.3     | 56.5 $\pm$ 7.6    |
|                                        | Post exercise (45 min) | 43.1 $\pm$ 6.1 *    | 86.9 $\pm$ 9.9    | 62.7 $\pm$ 8.1    |
|                                        | Recovery (105 min)     | 40.6 $\pm$ 5.6 *    | 78.8 $\pm$ 13.9   | 57.6 $\pm$ 9.3    |
| Urine Calcium Concentration (mmol/L)   | Pre exercise (0 Time)  | 3.3 $\pm$ 0.8       | 2.8 $\pm$ 0.6     | 2.3 $\pm$ 0.6     |
|                                        | Post exercise (45 min) | 2.3 $\pm$ 0.5       | 2.9 $\pm$ 0.6     | 1.9 $\pm$ 0.3     |
|                                        | Recovery (105 min)     | 2.8 $\pm$ 0.7       | 2.5 $\pm$ 0.4     | 1.8 $\pm$ 0.3     |

\* Significant effect of treatment, # significant effect of time, and ^ significant interaction from pre exercise to post exercise and post exercise to recovery for CON vs. MOD and MOD vs. HI compared by ANOVA.
